# Supplementary material for: Interleukin-6 and Oncostatin-M Synergize with the PI3K/AKT Pathway to Promote Aggressive Prostate Malignancy in Mouse and Human Tissues
Source: Oxford University Press journal article supplement (doi:10.1158/1541-7786.mcr-13-0238), 2013-07-19
Supplement: 15417786mcr130238-sup-tab1.xlsx [file 15417786mcr130238-sup-tab1.xlsx]

## Sheet: 130607 Phenotype Proportion Dat
Table 1: Quantification of phenotypes observed across five histological sections from independent biological replicates.
		GFP/RFP	GFP/IL6	GFP/OSM	Cre/RFP	Cre/IL6	Cre/OSM
Replicate 1, 1 graft	Normal	51	16	8	53	7	0
	Hyperplasia	6	23	1	11	13	7
	PIN	0	2	0	43	14	13
	Invasive Lesions	0	0	0	0	13	25
	Poorly Diff.	0	0	0	0	9	16
	Total Counts	57	41	9	107	56	61
Replicate 2, 1 graft	Normal	42	12	5	4	5	0
	Hyperplasia	6	6	1	3	8	6
	PIN	0	0	0	11	9	13
	Invasive Lesions	0	0	0	0	7	17
	Poorly Diff.	0	0	0	0	3	14
	Total Counts	48	18	6	18	32	50
Replicate 3, 2 grafts	Normal	224	16	127	65	49	39
	Hyperplasia	2	14	27	2	3	15
	PIN	0	2	0	12	17	20
	Invasive Lesions	0	0	0	0	10	10
	Poorly Diff.	0	0	0	0	7	19
	Total Counts	226	32	154	79	86	103
