# Supplementary material for: Interleukin-6 and Oncostatin-M Synergize with the PI3K/AKT Pathway to Promote Aggressive Prostate Malignancy in Mouse and Human Tissues
Source: Oxford University Press journal article supplement (doi:10.1158/1541-7786.mcr-13-0238), 2013-07-19
Supplement: 15417786mcr130238-sup-tab2.xlsx [file 15417786mcr130238-sup-tab2.xlsx]

## Sheet: Sheet1
Table 2: Quantification of phenotypes observed in human samples across four histological sections from independent biological replicates.
		RFP/GFP	RFP/IL6	RFP/OSM	AKT/GFP	AKT/IL6	AKT/OSM
Replicate 1, 2 grafts recovered	Normal	13	No Regen.	4	20	No Regen.	0
	PIN	0	No Regen.	0	23	No Regen.	4
	Dysplasia	0	No Regen.	0	0	No Regen.	26
	Totals	13	0	4	43	0	30
Replicate 2, 1 graft recovered	Normal	17	8	3	3	No Regen.	0
	PIN	0	0	0	14	No Regen.	3
	Dysplasia	0	0	0	0	No Regen.	7
	Totals	17	8	3	17	0	10
Replicate 3, 2 grafts recovered	Normal	n.t.	n.t.	No Regen.	n.t.	n.t.	0
	PIN	n.t.	n.t.	No Regen.	n.t.	n.t.	0
	Dysplasia	n.t.	n.t.	No Regen.	n.t.	n.t.	10
	Totals	0	0	0	0	0	10
Abbreviations
n.t. = not tested
No Regen. = No regenerations were observed.
